# Supplementary material for: The expanding universe of p53 targets
Source: Springer Nature journal article supplement (doi:10.1038/nrc2730), 2009-09-24
Supplement: 41568_2009_BFnrc2730_MOESM197_ESM.pdf [file 41568_2009_BFnrc2730_MOESM197_ESM.pdf]

Supplemental Information S2 | Examples of noncanonical p53 REs from validated targets\*

| Gene          | 1st half-site | Spacer       | 2nd half-site | Total mismatches | Spacer | Features          |
|---------------|---------------|--------------|---------------|------------------|--------|-------------------|
| PCNA          | GAACAAGTCC    |              | GGGCATaTgT    | 2                | 0      | Three-quarters**  |
| PLK3          | tAACATGCCC    | GGGCAA       | AAGCgAGCgC    | 3                | 5      | Three-quarters**  |
| TNFRSF10A     | GGGCATGTCC    |              | GGGCAgGagg    | 4                | 0      | Three-quarters**  |
| FANCC,<br>FAC | GGACATGTTT    | aaataacttga  | GAGCTAtTTT    | 0                | 10     | half RE           |
| HD            | GGGCcTGCTT    | ccagtt       | AAGCTTGCTT    | 1                | 6      | half RE           |
| BCL6          | AGACAgtTGCTT  | ggggggtgattc | GGGCTAGTCT    | 1                | 12     | half RE           |
| ARID3A        | GGACAcGCTg    |              | GGACATGCCT    | 2                | 0      | half RE           |
| CDKN1A        | GAAgAAGaCT    |              | GGGCATGTCT    | 2                | 0      | half RE           |
| GPX1          | GGGCcAGaCC    |              | AGACATGCCT    | 2                | 0      | half RE           |
| CTSD          | AAGCTgGgCC    |              | GGGCTgaCCC    | 4                | 0      | MM in both RCWWGY |

\*Presented are examples of validated p53 REs that represent noncanonical signatures (half and three-quarter sites or mismatches in the CWWG cores of both p53 decamer sites).

\*\*The GGGCA sequence results in a three-quarter site with the first decamer.
