# Supplementary material for: The expanding universe of p53 targets
Source: Springer Nature journal article supplement (doi:10.1038/nrc2730), 2009-09-24
Supplement: 41568_2009_BFnrc2730_MOESM198_ESM.pdf [file 41568_2009_BFnrc2730_MOESM198_ESM.pdf]

Supplemental Information S3 | Novel validated p53 REs that differ widely from consensus\*

| Gene         | Description                         | Reported p53 RE                       |                        |                             | Gene Ontology |
|--------------|-------------------------------------|---------------------------------------|------------------------|-----------------------------|---------------|
|              |                                     | Decamer 1                             | Spacer                 | Decamer 2                   |               |
| BDKRB2, BK2  | bradykinin receptor B2              | GGA <b>ag</b> TGCCC                   |                        | AGG <b>aggc</b> Tga         | CytoR         |
| BTG2, TIS21  | BTG family, member 2                | AG <b>tCcgGgCa</b>                    | <b>g</b>               | AG <b>cCcgagCa</b>          | Cell cycle    |
| CAV1         | caveolin 1, caveolae protein, 22kDa | G <b>cc</b> CAAG <b>CaC</b>           | <b>cccagcgcggg</b>     | AG <b>AaAc</b> GTTC         | Transport     |
| CTSD, IRDD   | cathepsin D                         | AA <b>c</b> CTT <b>Gg</b> TT          | <b>tgc</b>             | AAG <b>aggc</b> TTC         | ECM           |
| CTSD, IRDD   |                                     | AAGCT <b>gGg</b> CC                   |                        | GGGCT <b>ga</b> CCC         | ECM           |
| DUSP1, MKP1  | dual specificity phosphatase 1      | GG <b>tC</b> cTGCCC                   | <b>a</b>               | GG <b>caAA</b> t <b>ggg</b> | Cell cycle    |
| HGF, SF      | hepatocyte growth factor            | A <b>c</b> ACAT <b>G</b> T <b>a</b> T |                        | <b>tttC</b> cTGTTT          | Cell cycle    |
| HIC1         | hypermethylated in cancer 1         | GGGC <b>gc</b> TGCCC                  |                        | <b>tGGCA</b> caGCTC         | Transcription |
| KRT8, CK8    | keratin 8                           | <b>ccGC</b> cTGCCT                    | <b>cc</b>              | A <b>ctC</b> cTGCCT         | CytoS         |
| MET          | met proto-oncogene                  | GGAC <b>ggaCag</b>                    | <b>cacgcgagggcagac</b> | AGAC <b>A</b> c <b>GTgC</b> | Cell cycle    |
| PCBP4, MCG10 | poly(rC) binding protein 4          | GG <b>t</b> CTT <b>Gg</b> CC          | <b>c</b>               | AGACTT <b>AGCaC</b>         | Apoptosis     |
| PCBP4, MCG10 |                                     | GA <b>ACTTAA</b> G <b>a</b> CC        | <b>gaggctct</b>        | GGACA <b>AGTTg</b>          | Apoptosis     |
| SH2D1A, SAP  | SH2 domain protein 1A, Duncan's     | GGGCT <b>gG</b> GCTC                  |                        | GGCT <b>gG</b> GCTC         | CytoR         |
| SH2D1A, SAP  | disease                             | <b>cAAc</b> acTGC <b>aC</b>           | <b>tagt</b>            | GGGCT <b>gG</b> GCTC        | CytoR         |
| TYRP1, TRP-1 | tyrosinase-related protein 1        | GAGC <b>Ag</b> aTTT                   | <b>gggattaattatc</b>   | AGGC <b>Ag</b> ca <b>aT</b> | Metabolism    |
| TYRP1, TRP-1 |                                     | <b>cc</b> ACATGC <b>aC</b>            |                        | <b>ttAa</b> cAGTTC          | Metabolism    |
| TYRP1, TRP-1 |                                     | AGAC <b>c</b> AGCCC                   | <b>cc</b>              | <b>cG</b> cCTAGTTT          | Metabolism    |

\*Presented is a complete list of p53 REs from the validated genes described in REF. 12 where the proposed RE sequence differs widely from consensus sequence.
